# Supplementary material for: Cone Genesis Tracing by the Chrnb4-EGFP Mouse Line: Evidences of Cellular Material Fusion after Cone Precursor Transplantation
Source: PubMed Central journal article supplement (PMC5363218; doi:10.1016/j.ymthe.2016.12.015), 2017-01-28
Supplement: mmc1.pdf [file mmc1.pdf]

YMTHE, Volume 25

## **Supplemental Information**

### **Cone Genesis Tracing by the *Chrn4*-EGFP**

#### **Mouse Line: Evidences of Cellular Material Fusion after Cone Precursor Transplantation**

**Sarah Decembrini, Catherine Martin, Florian Sennlaub, Sylvain Chemtob, Martin Biel, Marijana Samardzija, Alexandre Moulin, Francine Behar-Cohen, and Yvan Arsenijevic**

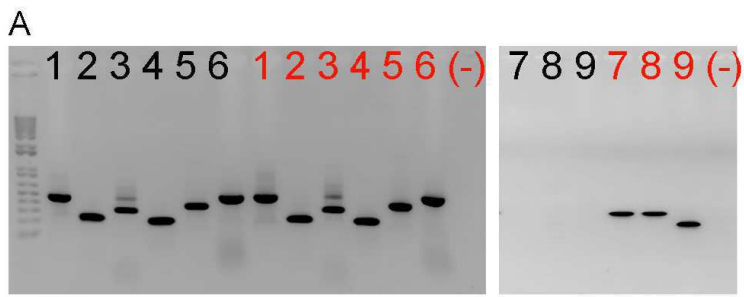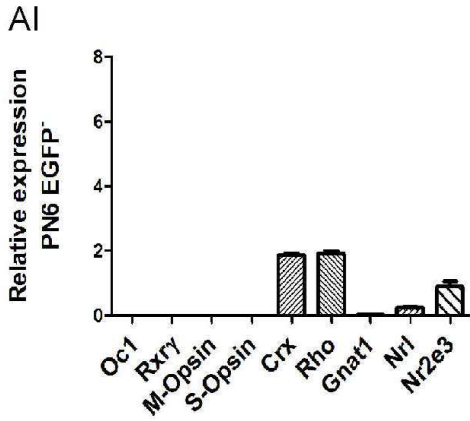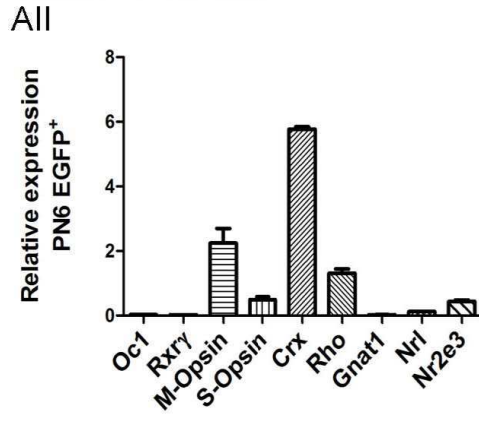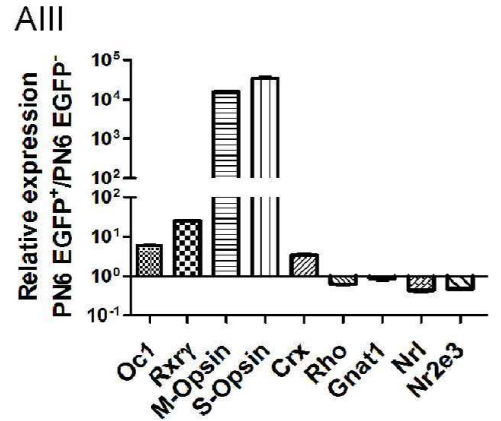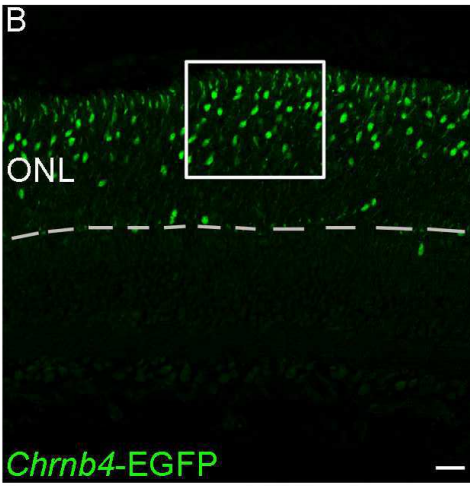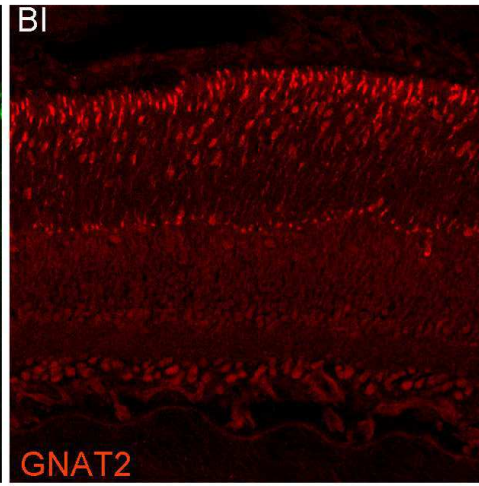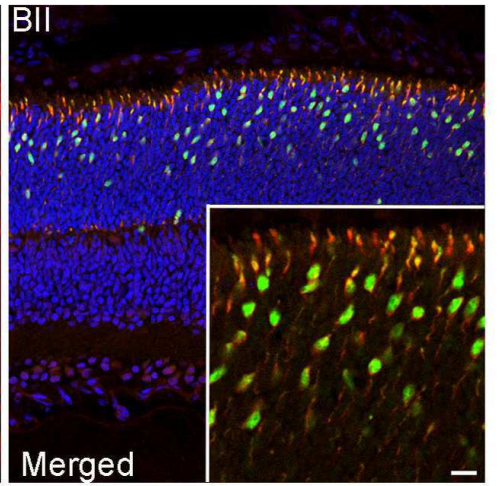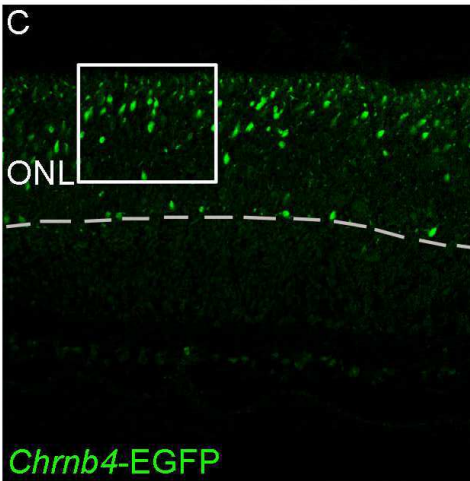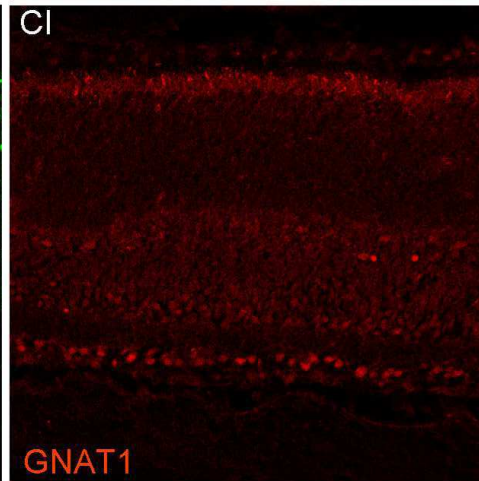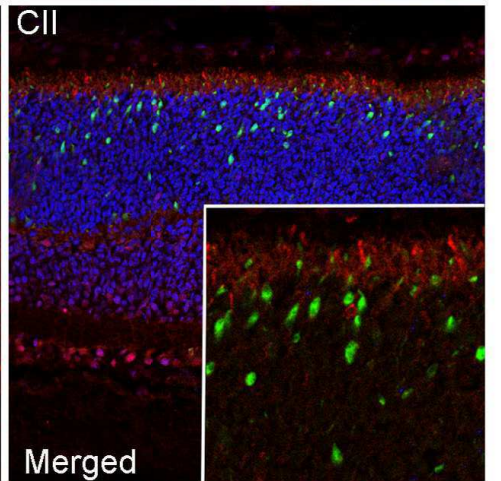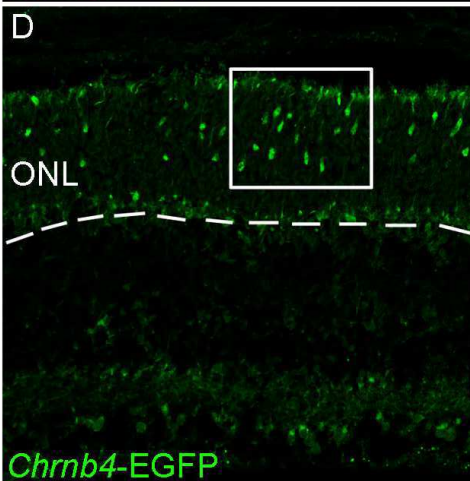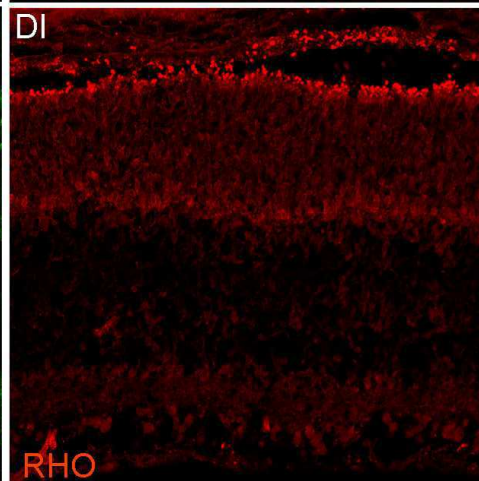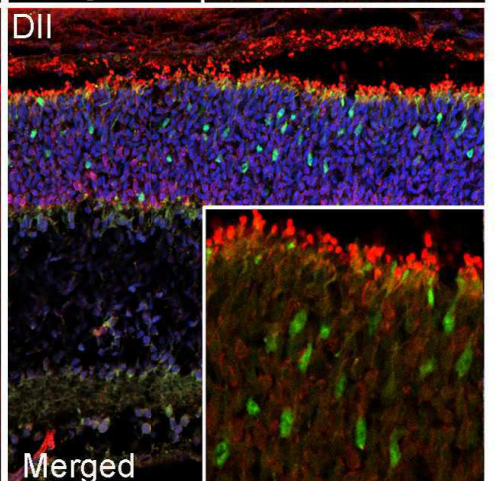

**Supplementary Figure 1. The PN6 *Chrn4*-EGFP-positive cells show characteristics of newly formed cones.** (A) RT-PCR on EGFP-positive (red numbers) and negative (black numbers) cells selected at PN6 isolated by FACS. 1.*Gapdh*, 2.*Gnat1*, 3.*Nr2e3*, 4. *Nrl*, 5.*Crx*, 6. *Rhodopsin*, 7. *Gnat2*, 8. *S-Op sin*, 9. *M-Op sin*. (AI-III) Gene expression profile (RT-qPCR) of FACS-sorted PN6 EGFP-positive and negative cells. Normalization performed with *Erl8* gene. Photoreceptor specific markers: cone and horizontal precursors (*Oc1*), cone cells (*Rxry*, *Trb2*, *M-Op sin*, *S-Op sin*), photoreceptors (*Crx*) and rod cells (*Rhodopsin*, *Gnat1*, *Nrl*, *Nr2e3*), (n=3). (B to DII) PN6 retina sections from the *Chrn4*-EGFP mouse line. (B-D) EGFP is mainly detected in the ONL with cells appearing to migrate to the outer part of the ONL. These EGFP-positive cells express the cone marker GNAT2 (BI-II) but not the rod marker GNAT1 (CI-II) or Rhodopsin (D-II). Inserts in BII to DII are the enlargements of white squares from B to D. Abbreviation: ONL: outer nuclear layer. n = 3 analysed sections. Scale bars = 20  $\mu$ m in A-DII, and B-BIII, 10  $\mu$ m in inserts.



*Chmb4*-EGFP

CHRNB4

Merged

E12.5

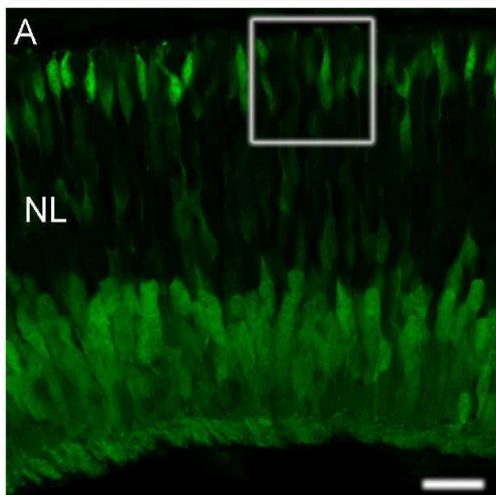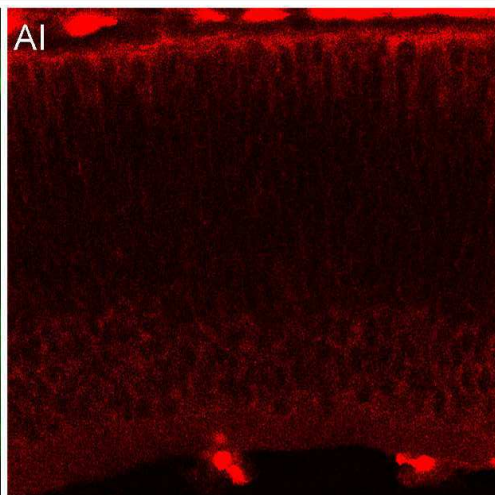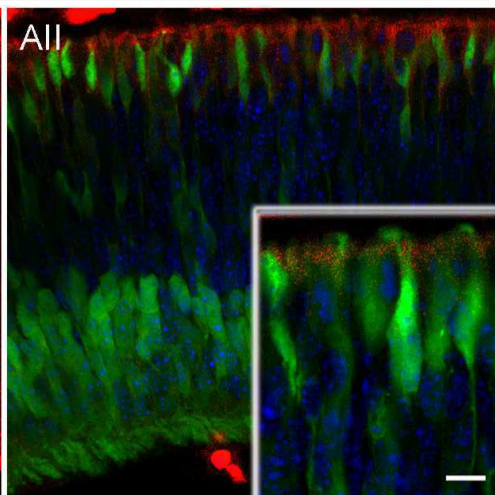

E15.5

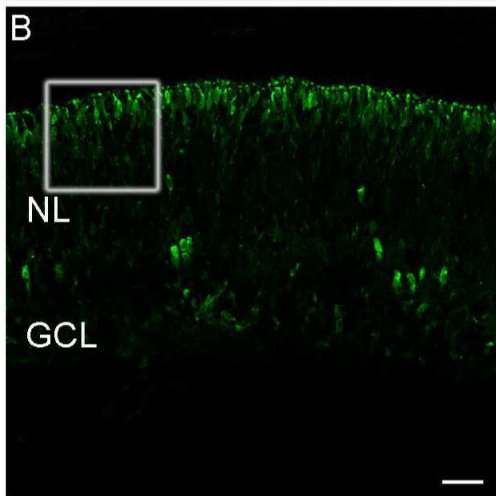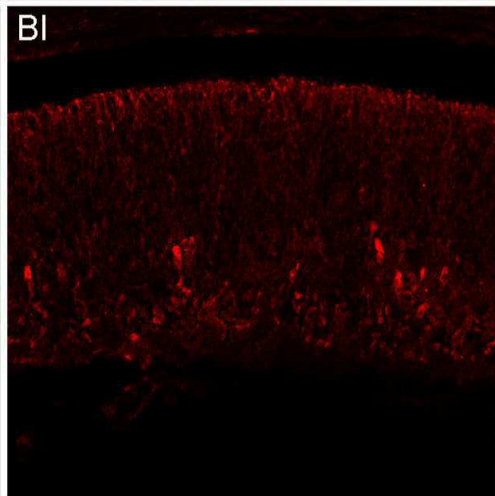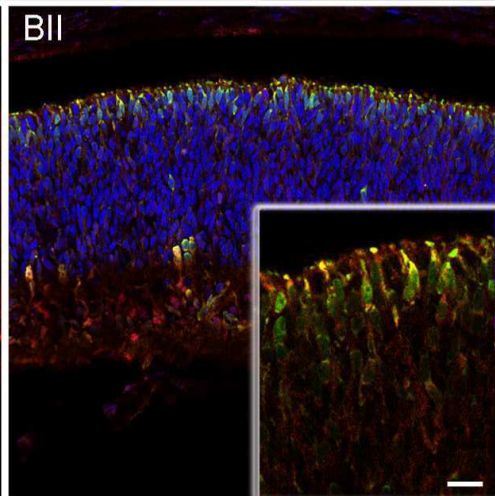

Adult

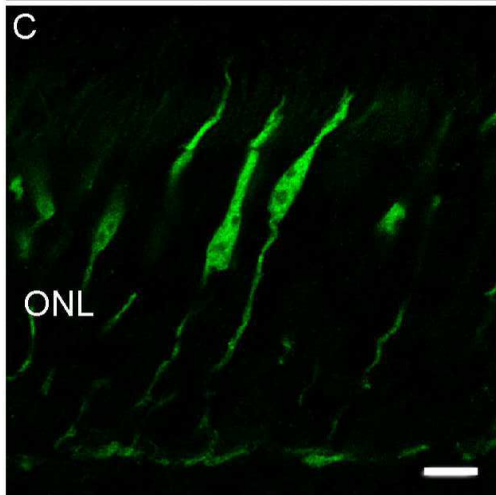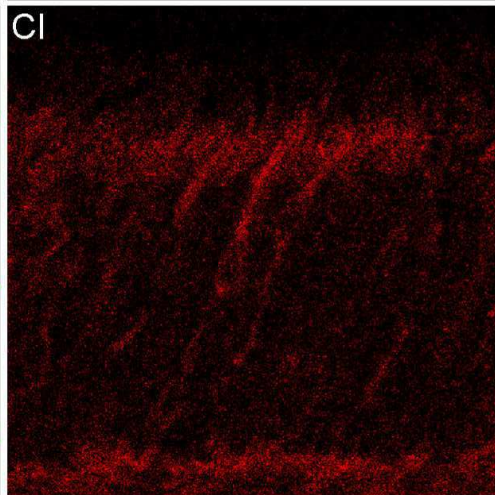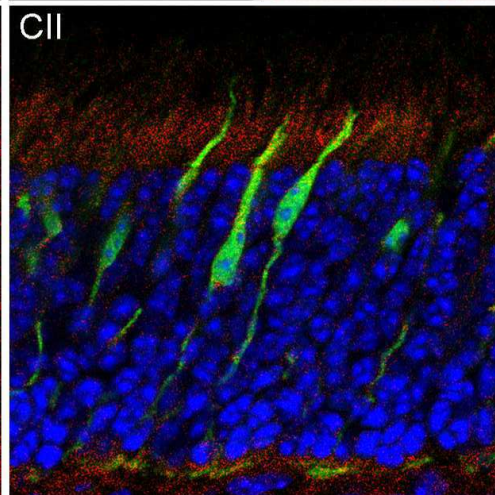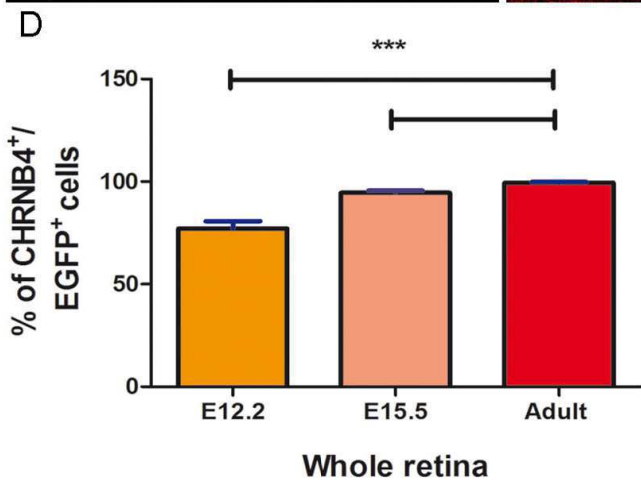

**Supplementary Figure 2. The CHRNB4 protein in the retina is highly co-expressed with the reporter protein of the Chrn4-EGFP mouse.** Transversial sections of E12.5 (**A-AII**) E15.5 (**B-BII**) and adult retina (**C-CII**). (**A-AII**) CHRNB4 (in red) is faintly expressed in the basal and apical region of the E12.5 retinas. The protein is much more present at E15.5 (**B-BII**) and is then restricted to the cones only in the adult retina (**C-CII**). Inserts in (**AII-BII**) are high magnification micrographs from white squares in **A** and **B**. (**D**) Percentage of CHRNB4-positive cells over all EGFP-positive cells at the analysed ages. ANOVA with Tukey's correction \*\*\* $P < 0.001$  (n=3, 5, and 3 per E12.5, E15.5 and adult retinas). Error bars correspond to S.E.M. ONL: outer nuclear layer, NL: Neuroblastic layer, GCL=Ganglion cell layer. DAPI: nuclear staining (blue). Scale bars= 15  $\mu\text{m}$  in A-AII, 30  $\mu\text{m}$  in B-BII and 10  $\mu\text{m}$  in C-CII.

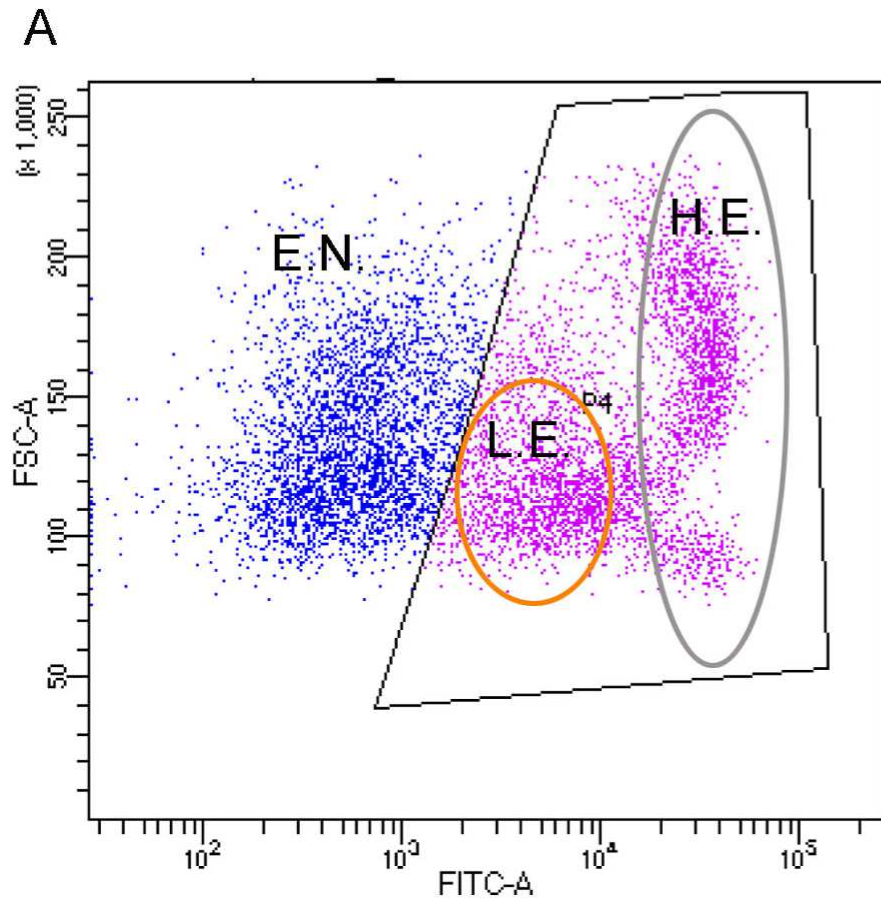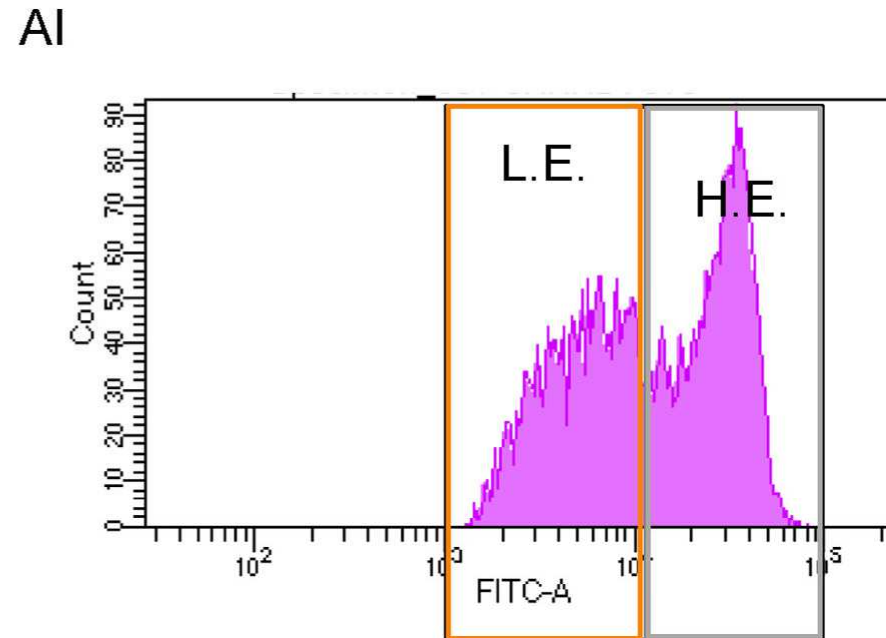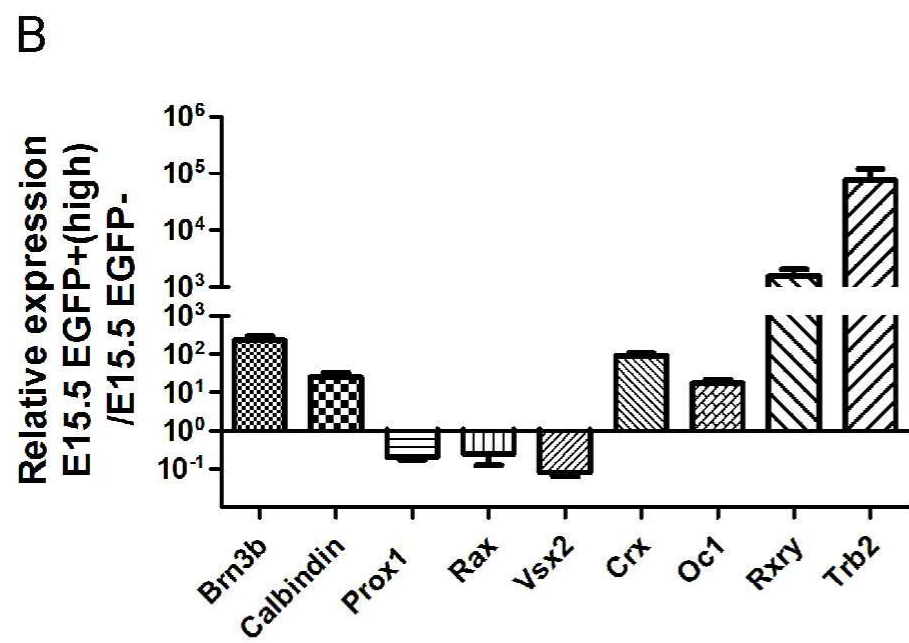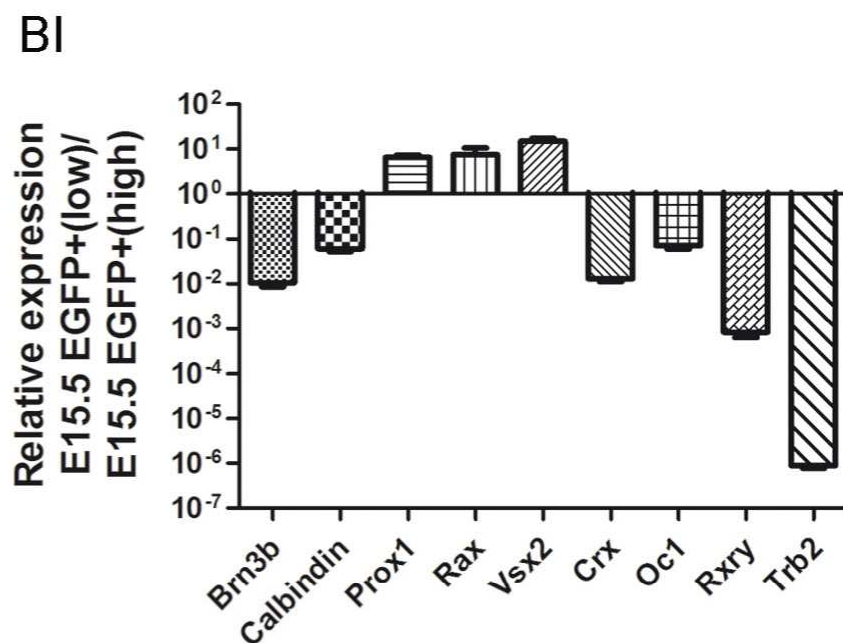

**Supplementary Figure 3. Characterization of E15.5 Chrn4-EGFP-positive cells isolated by FACS. (A-AI)** FACS analysis of E15.5 isolated cells revealed low (LE) and high (HE) EGFP-expressing populations. **(B)** Q-PCR of the high-EGFP population indicates the presence of cone precursor cells (*Crx*, *Oc1*, *Rxr* and *Trb2*) as well as cells committed to the RGC and Horizontal cell fates (*Brn3b* and *Calbindin* respectively). **(BI)** Cells expressing a low level of EGFP express genes of the retinal progenitor cells (*Prox1*, *Rax* and *Vsx2*).



*Cnga3*<sup>-/-</sup>, 3 months old

DAPI

Merge and Magnification

GFAP

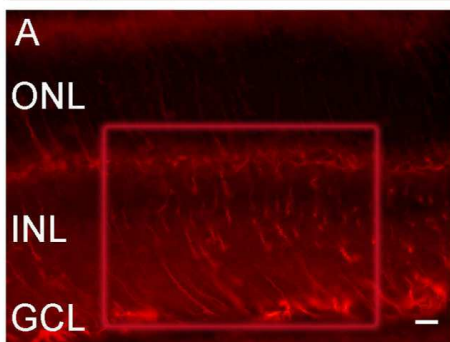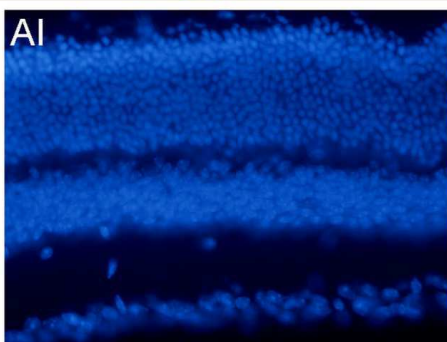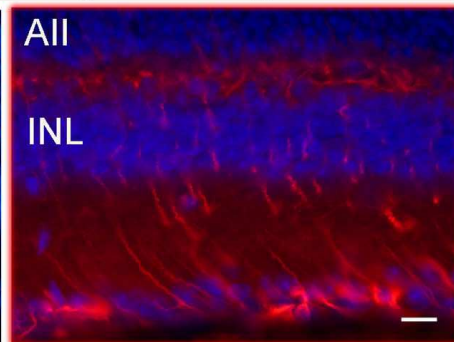

Zo1

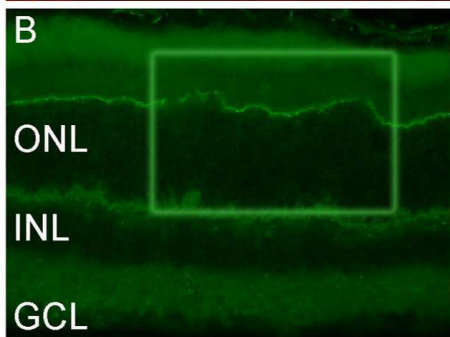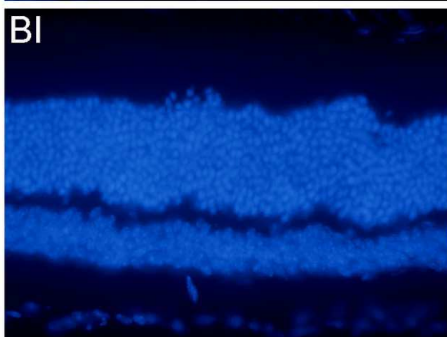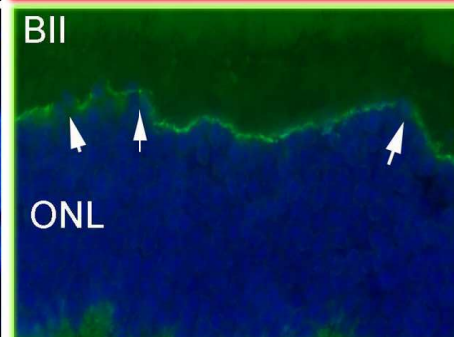

*Cnga3*<sup>-/-</sup>, 2 months old

GFAP

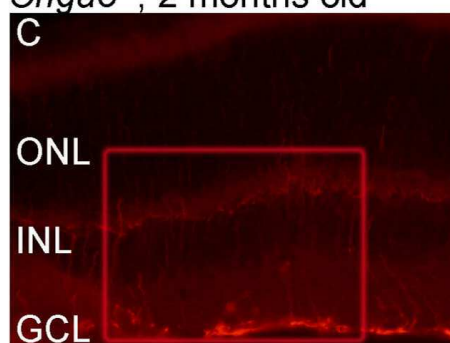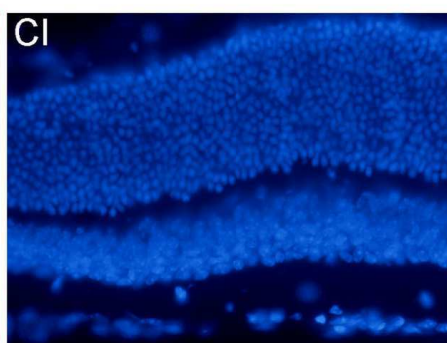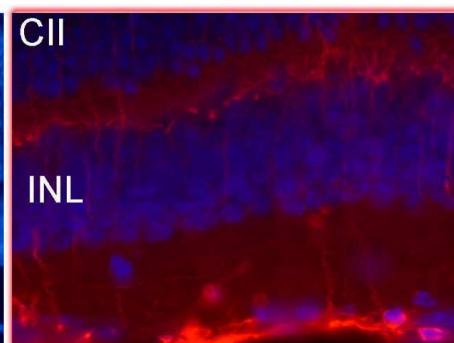

Zo1

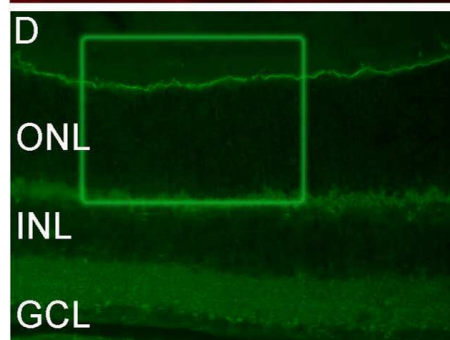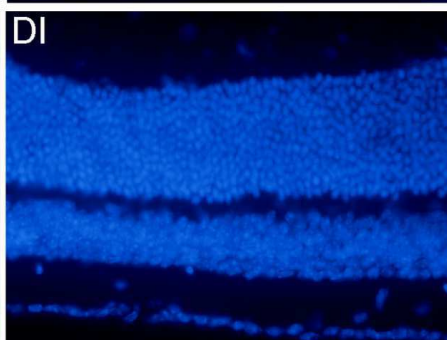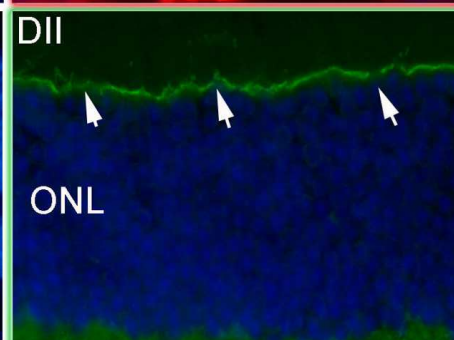

*Cnga3*<sup>-/-</sup>, 3 weeks old

GFAP

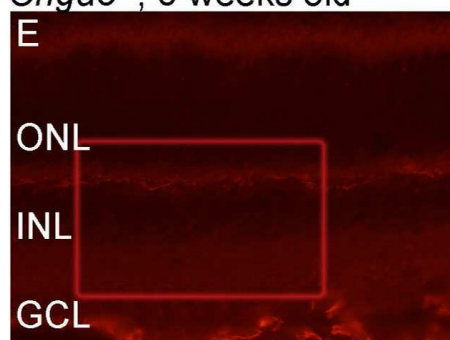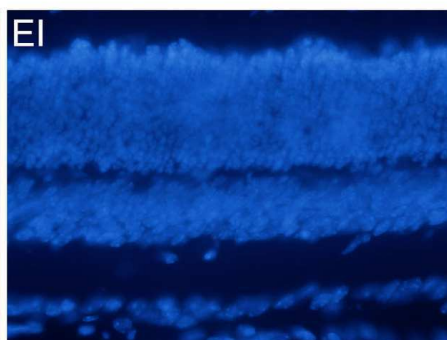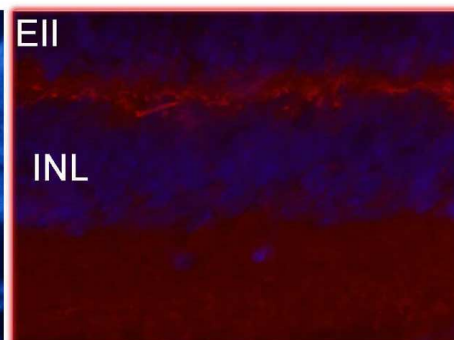

Zo1

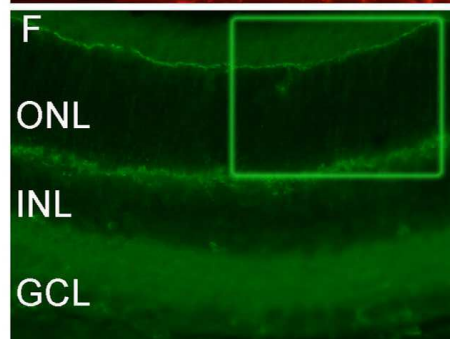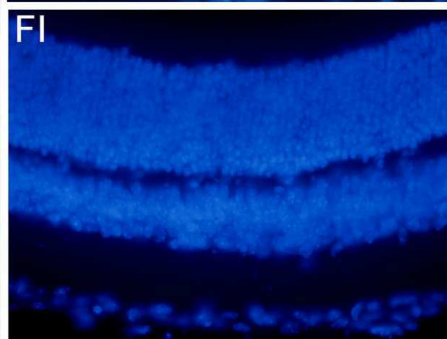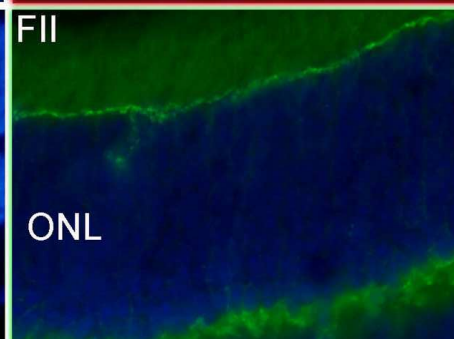



**Supplementary Figure 4. Glial scarring and outer limiting membrane integrity over time in *Cnga3*<sup>-/-</sup> mice.** (A,AII, C,CII, E,EII) Gliotic response detected by GFAP immunostaining (red) and (B,BII, D,DII, F,FII) OLM integrity, evaluated by ZO1 immunostaining (green) in mice at different ages. (BII, DII) Rupture of the OLM indicated with white arrows. (AII-FII) High magnification of red square in A-F. ONL and INL; outer and inner nuclear layer, GCL, ganglion cell layer. DAPI: nuclear staining (blue). Scale bars = 15  $\mu\text{m}$  in A-F and AI-FI, and 12  $\mu\text{m}$  in AII-FII.

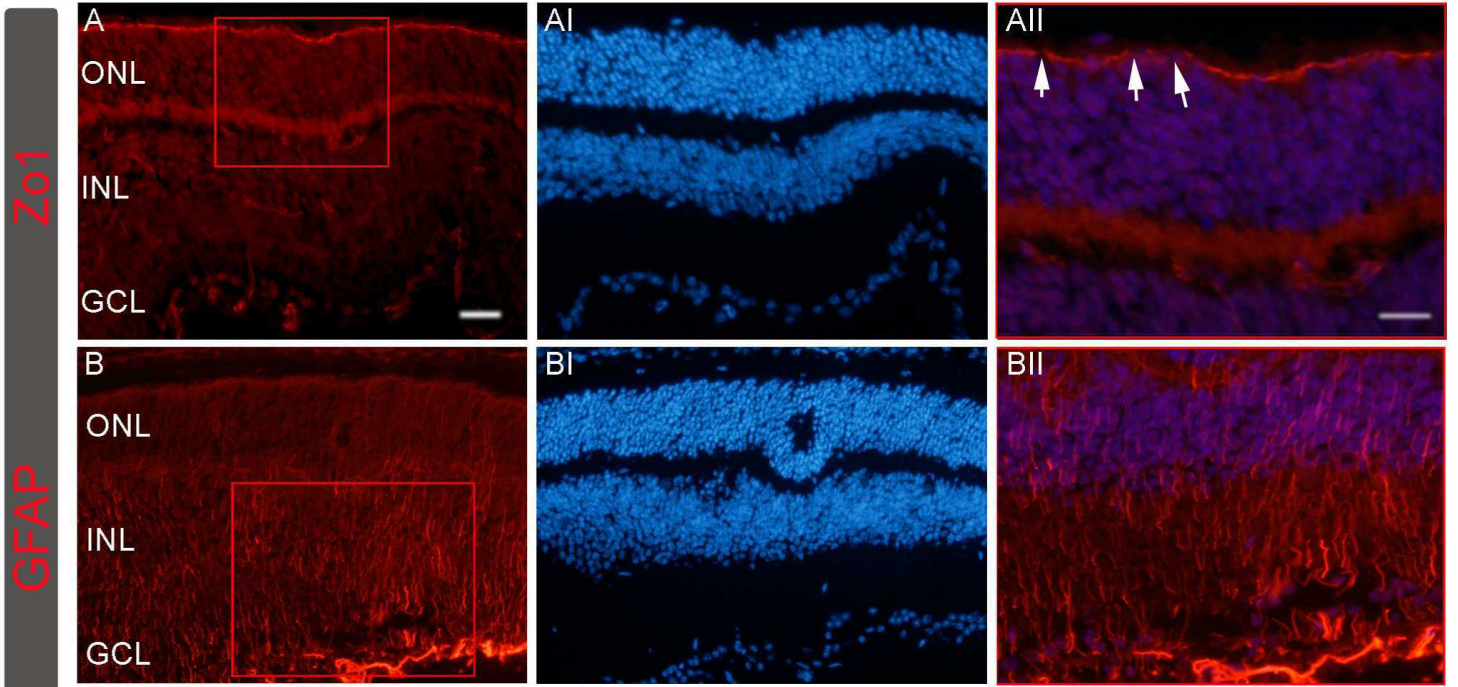

*Nrl*<sup>-/-</sup>; *Rpe65*<sup>R91W/R91W</sup>, 1.5 month old

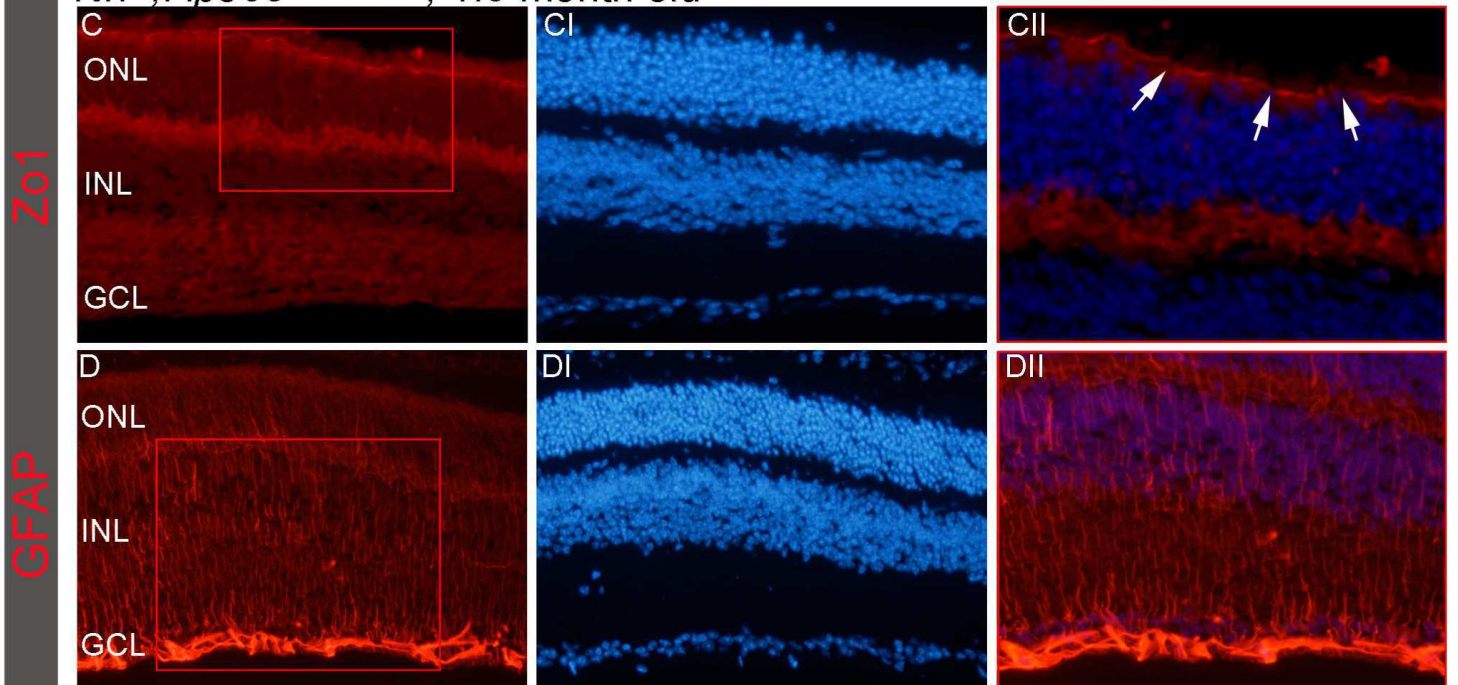

*Nrl*<sup>-/-</sup>; *Rpe65*<sup>R91W/R91W</sup>, 3 weeks old

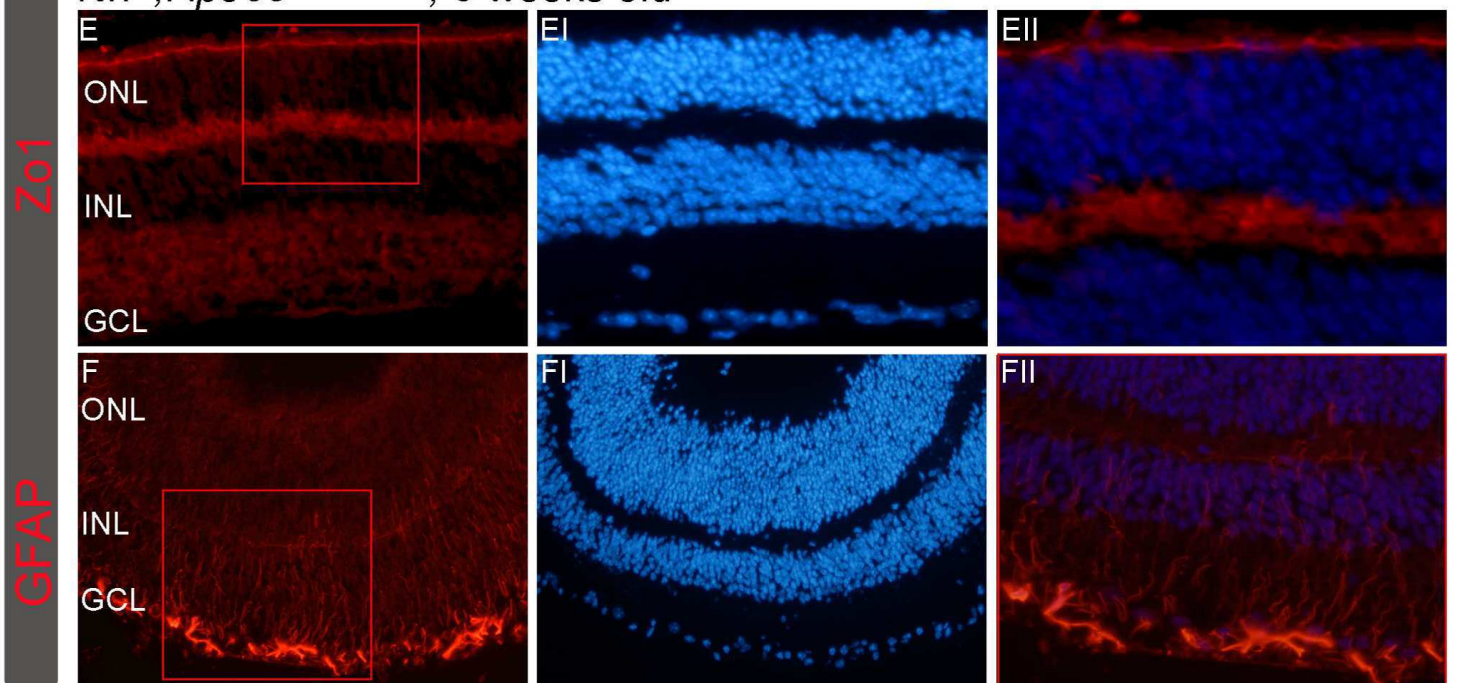

**Supplementary Figure 5. Glial scarring and outer limiting membrane integrity over time in *Nrl*<sup>-/-</sup>;*Rpe65*<sup>R91W/R91W</sup> mice. (B, BII, D, DII, F, FII)) Gliotic response detected by GFAP immunostaining (red) and (A, AII, C, CII, E, EII) OLM integrity, evaluated by ZO1 immunostaining (red) in mice at different ages. (AII-FII) High magnification of red squares in A-F. Abbreviation: ONL and INL, outer and inner nuclear layer, GCL, ganglion cell layer. DAPI nuclear staining (blue). Scale bars= 10μm in A-AI, B-BI, C-CI, D-DI, E-EI, F-FI and 20μm in AII,FII.**



MATURE CONES VS IMMATURE CONES

*Cnga3<sup>-/-</sup>*

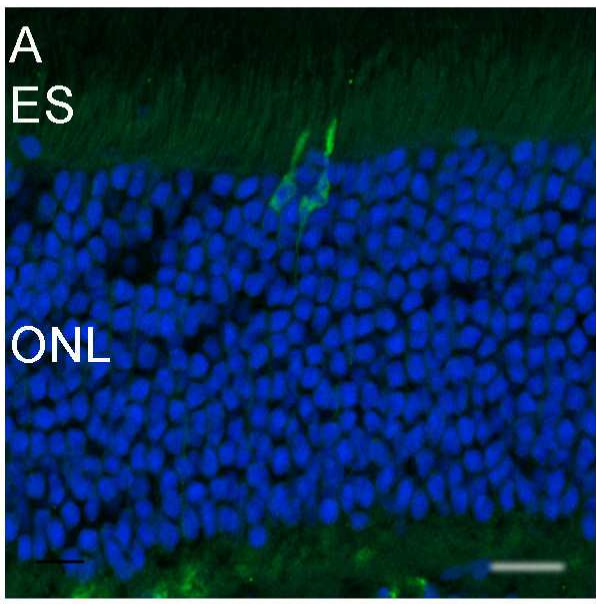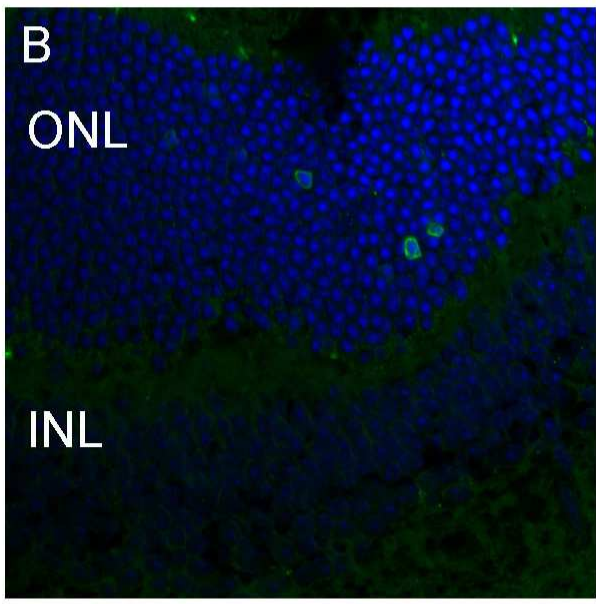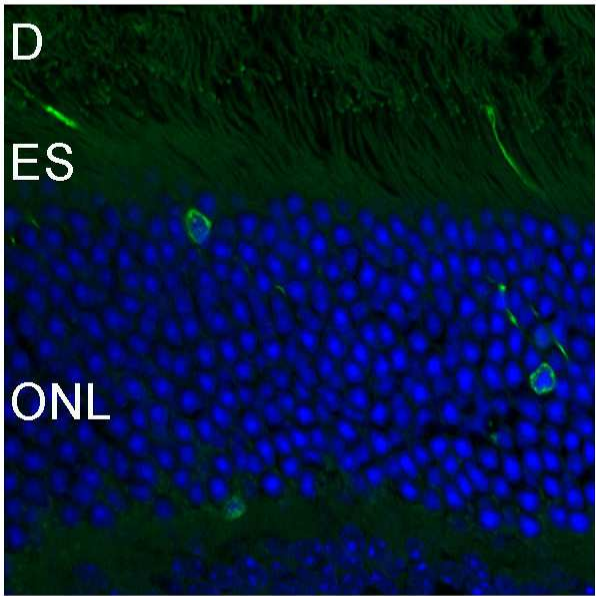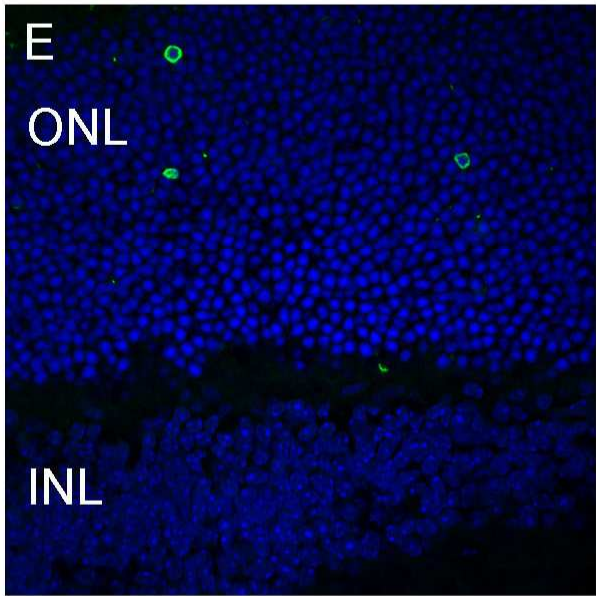

*Nrl<sup>-/-</sup>; Rpe65<sup>R91W/R91W</sup>*

C

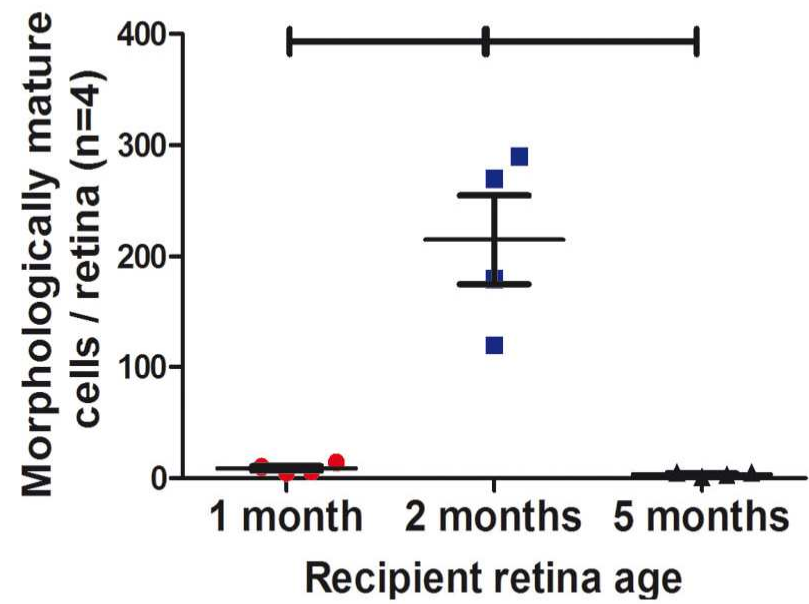

F

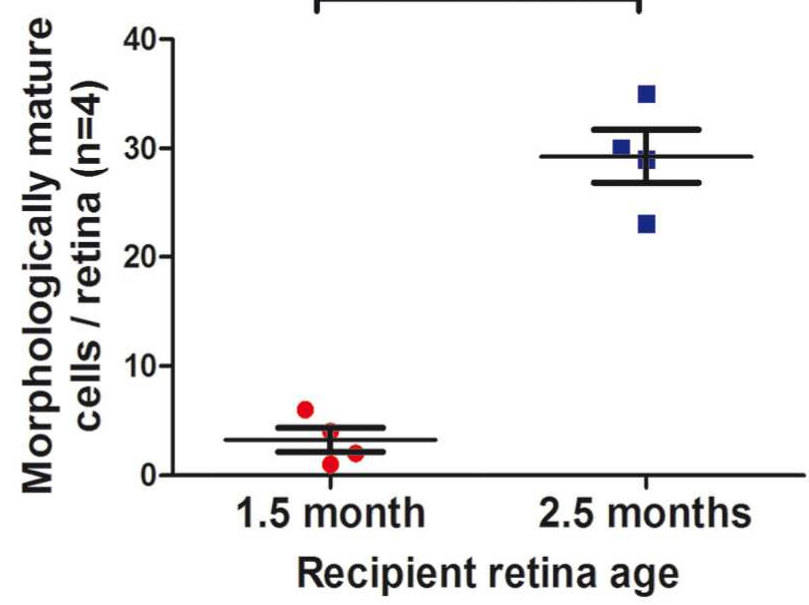

**Supplementary Figure 6. A cone dystrophic retina does not favour E15.5 *Chrn4*-EGFP cell integration after transplantation into *Cnga3*<sup>-/-</sup> and *Nrl*<sup>-/-</sup>; *Rpe65*<sup>R91W/R91W</sup> adult retinas.** (A-D) Examples of mature and (B, E) immature cone photoreceptors after transplantation into different recipient retinas. (C, F) Quantification of morphologically mature donor cells in the adult retinas defined by the presence of the external segment. Error bars correspond to S.E.M. Abbreviations: ES=External segment, ONL and INL = outer and inner nuclear layer. DAPI nuclear staining (blue) (D, G, J). ANOVA with Tukey's correction \*\*\*P<0.001; n=3. Scale bars=20µm in A, D and 40µm in B, E.

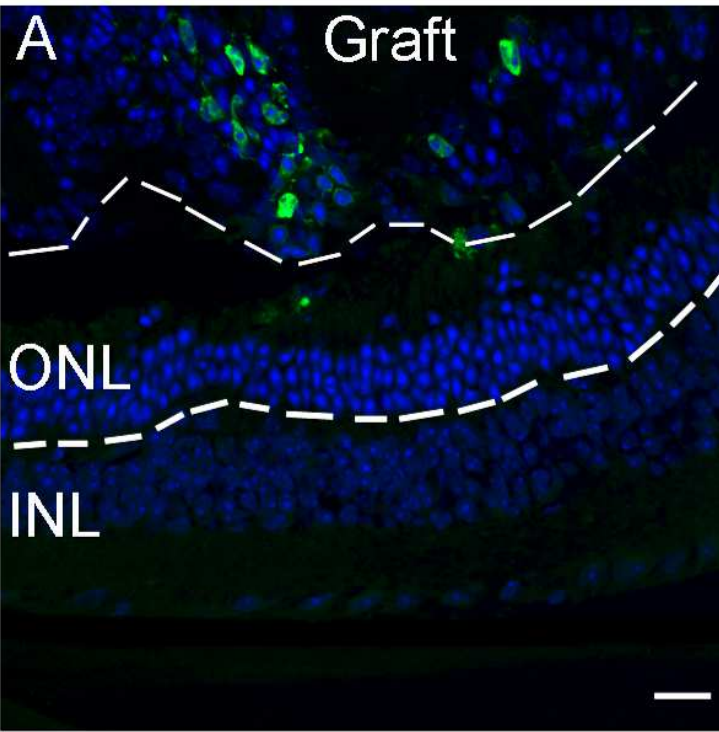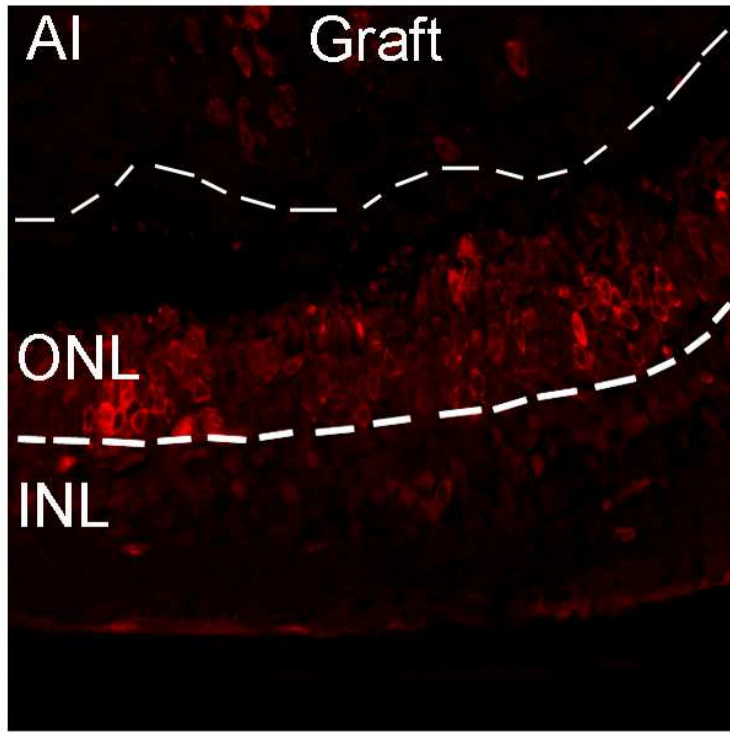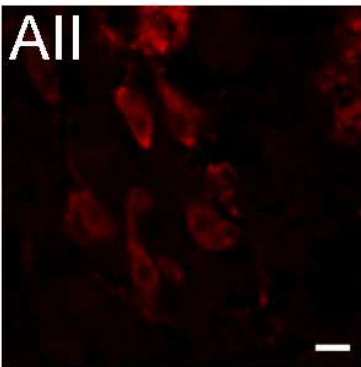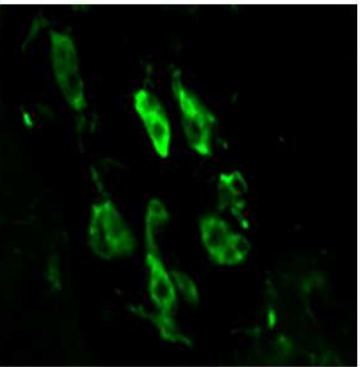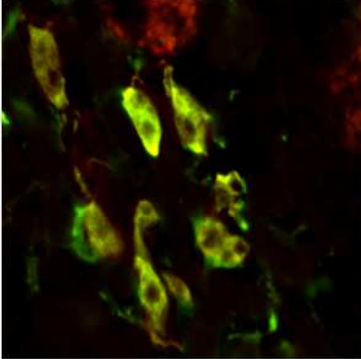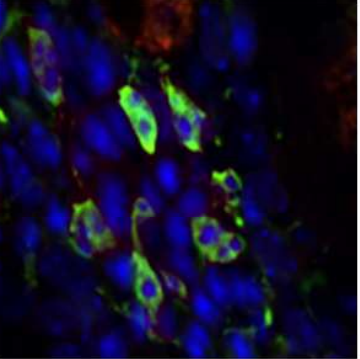



**Supplementary Figure 7. Evidence of material exchanges between the host retina towards the graft.** (A-AI) Slices of a DsRed retina transplanted with E15.5Chrn4-EGFP cells. Note the mass of the graft below the retina (blue and green cells above the thin dashed line). (AII) High magnification of EGFP-positive cells in the graft reveal the presence of cells also positive for DsRed. Abbreviations: ONL and INL: outer and inner nuclear layer. Scale bars: 20  $\mu\text{m}$  in A-AI and 5  $\mu\text{m}$  in AII.

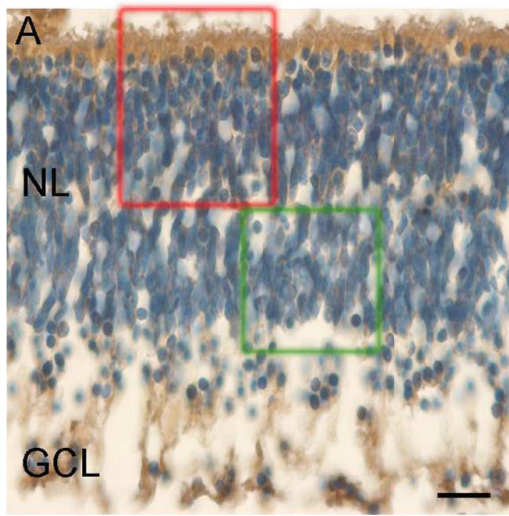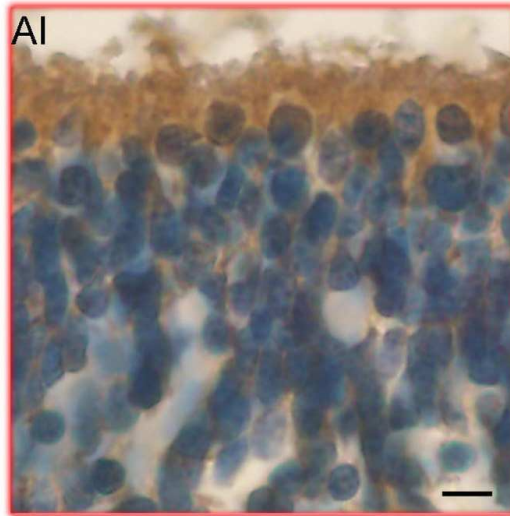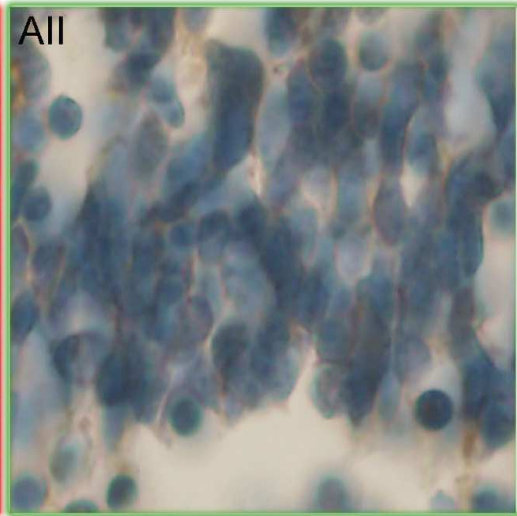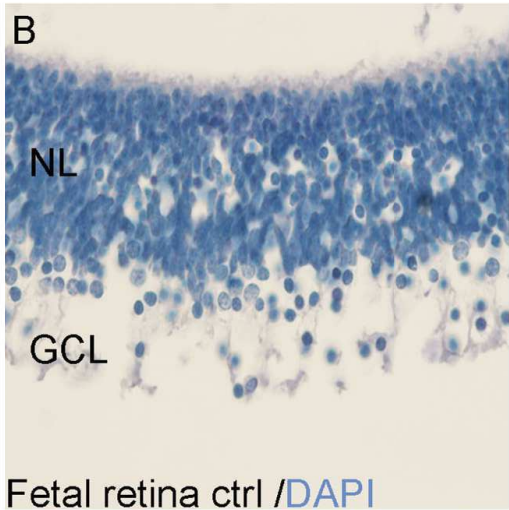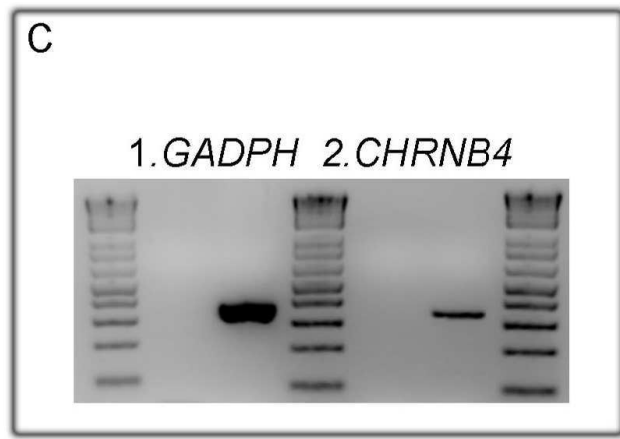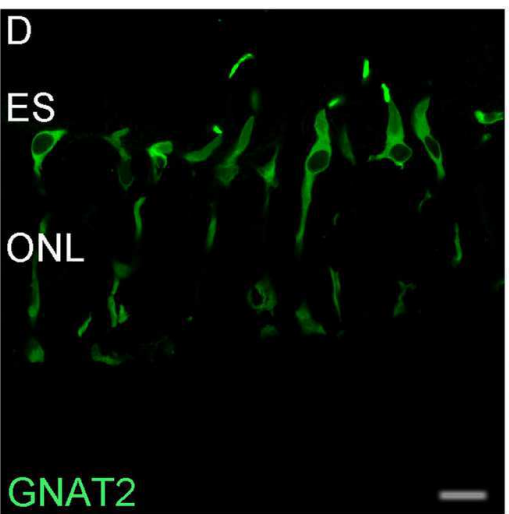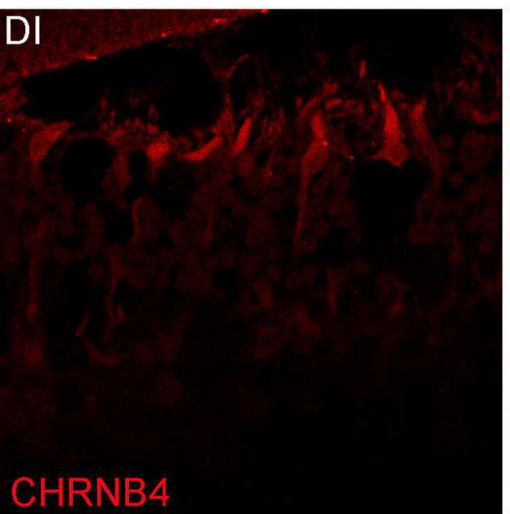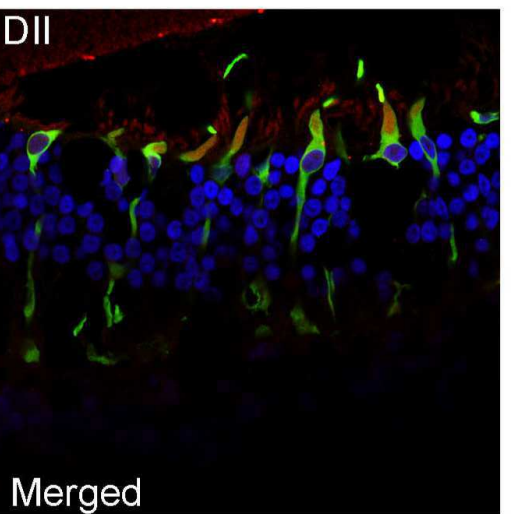

**Supplementary Figure 8. CHRNB4 is expressed in human foetal retina and adult cones.**

**(A-B)** Paraffin section of 3 month old foetal retina. The CHRNB4 protein is expressed in cells close to the apical and basal retinal side (dark brown). **(AI, AII)** Apical and basal magnification of (A) respectively. Note the staining in the cell periphery compatible with the localization of a receptor in the cell membrane **(B)** Staining of foetal retina without the first antibody (control, ctrl). **(C)** RT-PCR of *GAPDH* and *CHRNB4* from retina of a 78 year old donor. **(D-DII)** Double staining of GNAT2 (in green) and CHRNB4 (in red) in an adult retina from the same retina donor. ONL: outer nuclear layer, NL: neuroblastic layer, GCL: ganglion cell layer, ES: external segment. DAPI: nuclear staining (blue). Scale bars = 20  $\mu\text{m}$  in AI-AII, C-CII and 50 $\mu\text{m}$  in A, B.



**Primer list for qPCR**

mGnat2

FW gagggagtcacctgcatcat  
RV aagactcgtgcatgcgatt

mRxry

FW tcctccaggaatcaactgg  
RV agctgctgacactgttgacc

mCrx

FW ccccaatgtggacctgat  
RV ggctcctggtgaatgtgt

mGnat1

FW agagctggagaagaagctgaaa  
RV tagtgctcttcccggattca

mProx1

FW cgacatctcaccttattcagga  
RV ttgccttttcaagtattgg

mNrl

FW ttctggttctgacagtgactacg  
RV tgggactgagcagagagagg

mOnecut1

FW agaccttccggaggatgtg  
RV ttgctcttccgttgacag

mVsx2

FW cgtaagaagcggcgacac  
RV tctgggtagtgggcttcatt

mGapdh

FW gggttcctataaatacggactgc  
RV ccattttgtctacgggacga

mBrnb3

FW gcgctacacagtgctcccc  
RV actctcatccagcccgccga

mRhodopsin

FW acctggatcatggcgttg  
RV tgccctcaggatgtacc

mNr2e3

FW atctatgcctgcaatggctg

RV tctggtgcagacacagacg

mTrb2

FW gcactgaagaatgagcagac

RV acacagagctcatctttgtc

mCalbindin

FW ctcaaactagccgctgcac

RV gctcctggatcaagttctgc

mEr18

FW actggacagttcgtgtacth

RV gcttactcagagtcttcttg
